# Supplementary material for: FCN3 functions as a tumor suppressor of lung adenocarcinoma through induction of endoplasmic reticulum stress
Source: PubMed Central journal article supplement (PMC8050313; doi:10.1038/s41419-021-03675-y), 2021-04-15
Supplement: 41419_2021_3675_MOESM1_ESM.pdf [file 41419_2021_3675_MOESM1_ESM.pdf]

**A**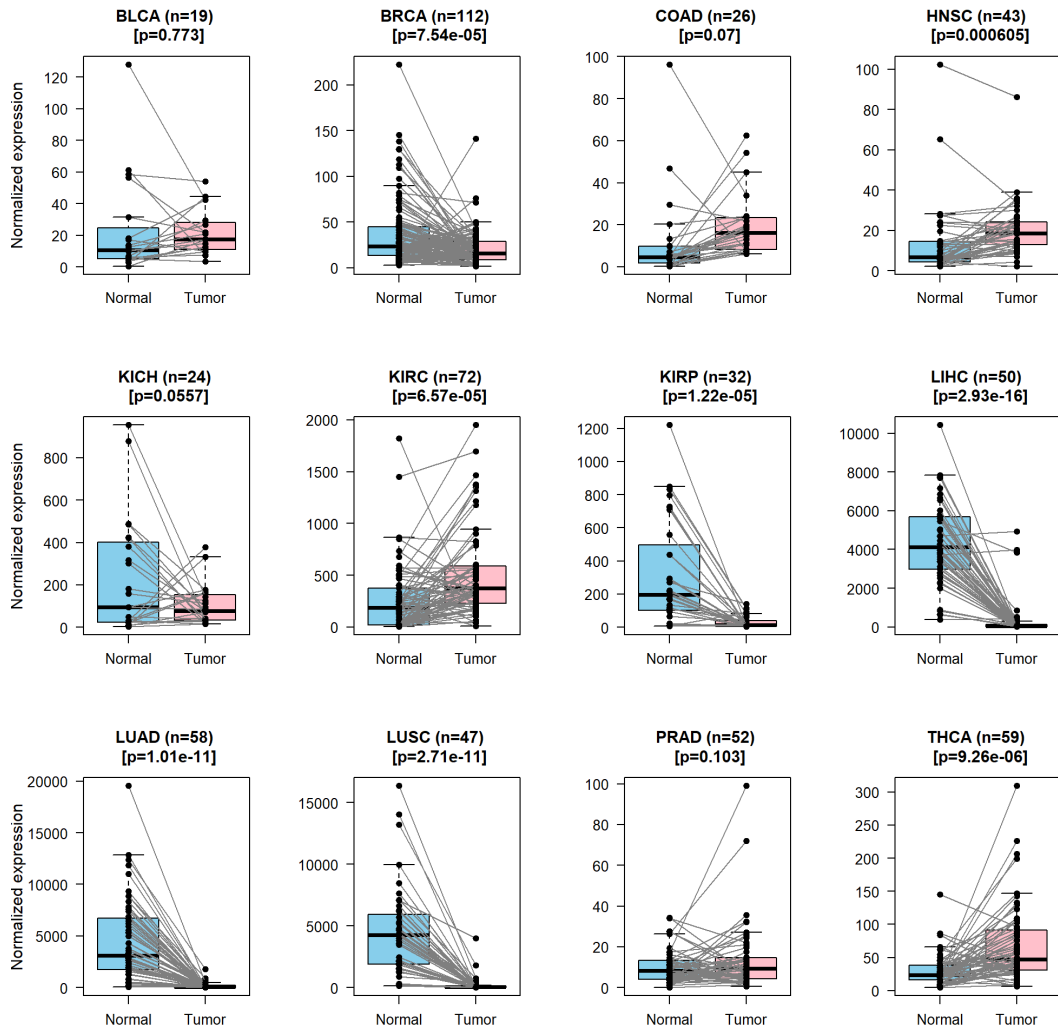**B**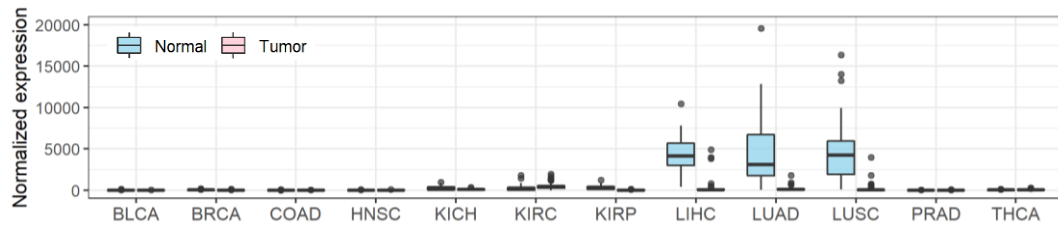

**Supplementary Fig. 1. Expression analysis of *FCN3* using normal-tumor matched patient data from TCGA.**

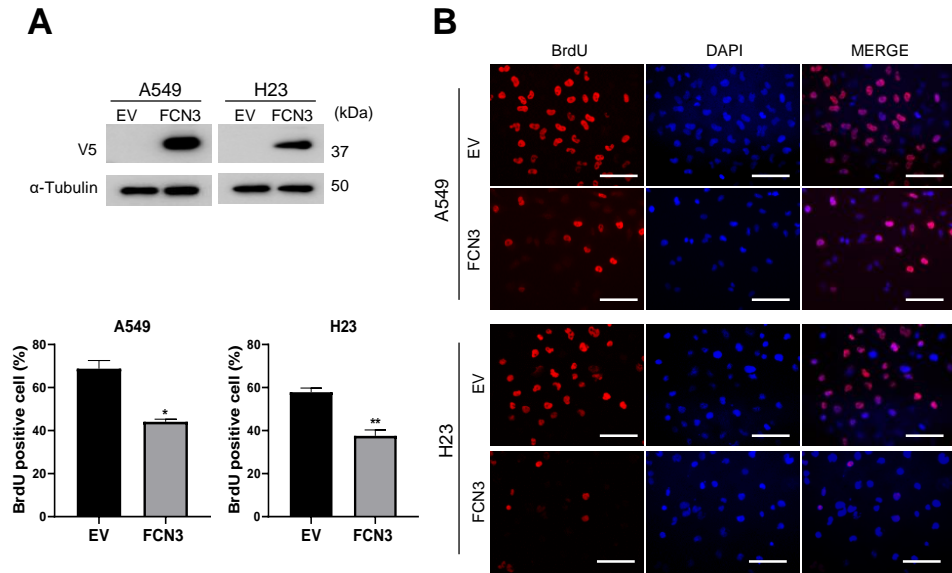

**Supplementary Fig. 2. Expression of FCN3 and BrdU labeling.**

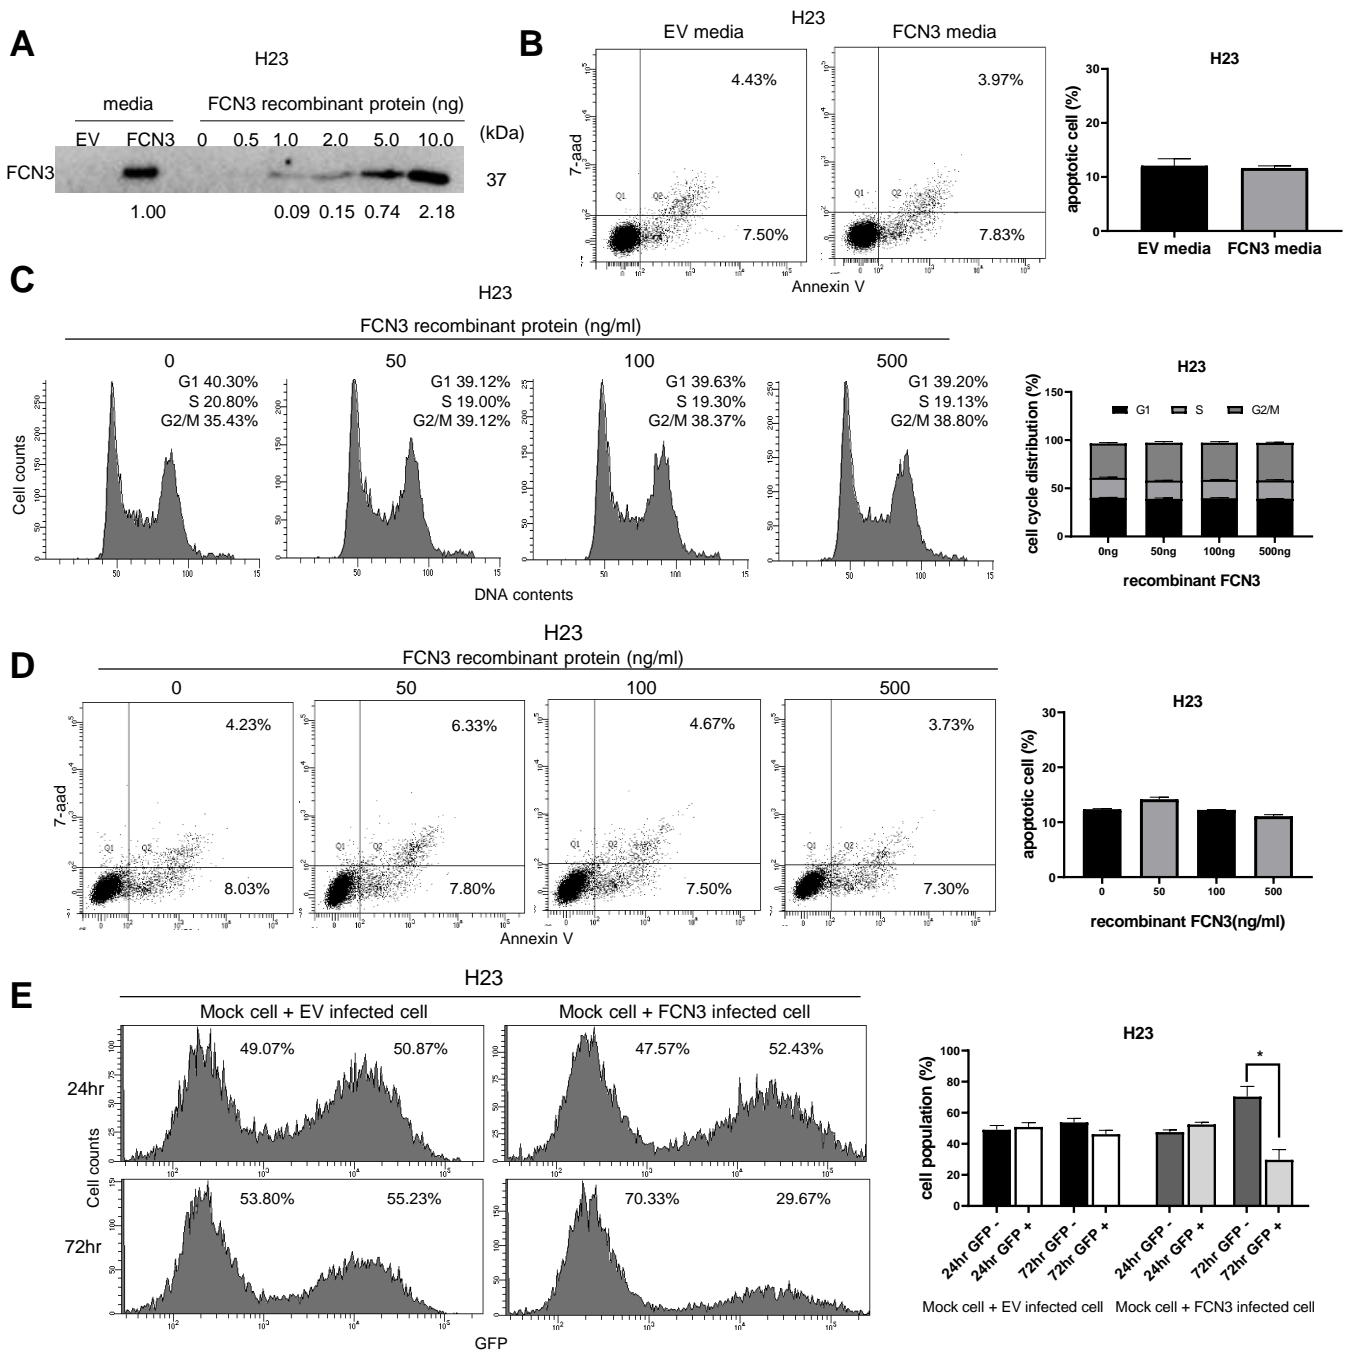

**Supplementary Fig. 3. Tumor suppressor activity of FCN3 involves an intracellular mechanism.**

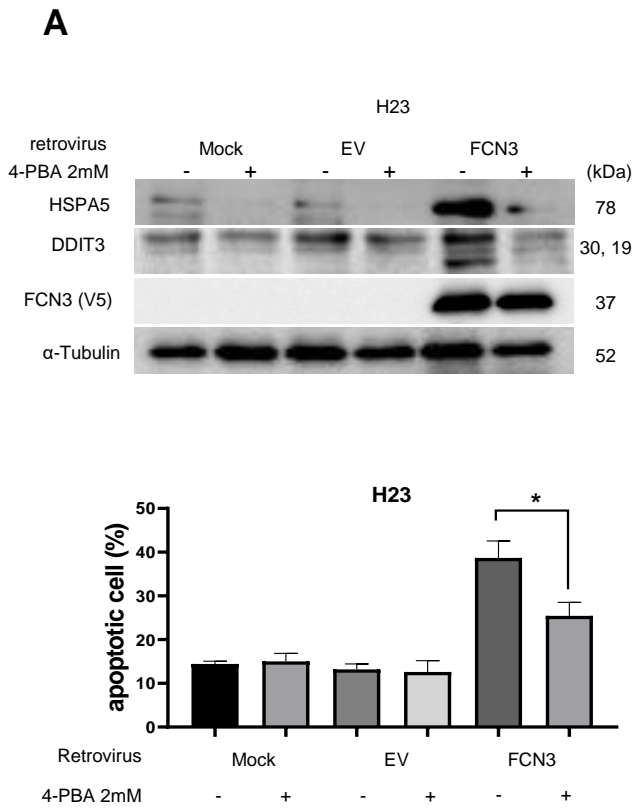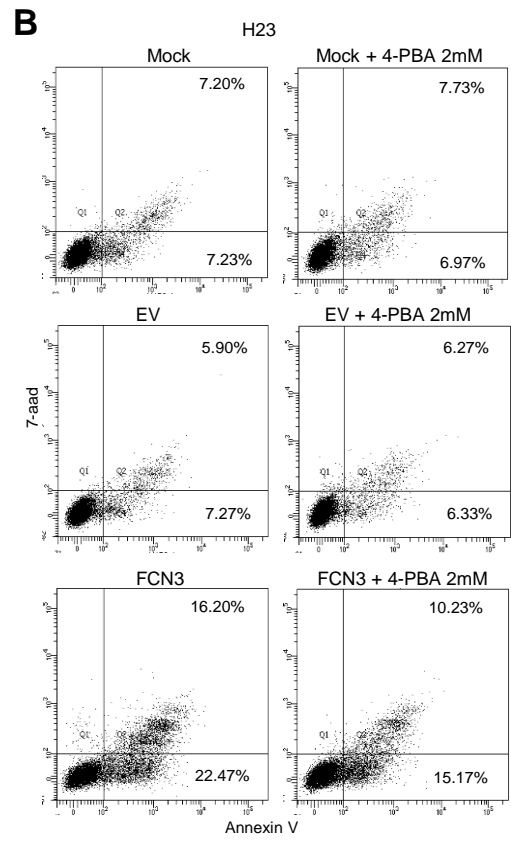

Supplementary Fig. 4. FCN3 induces ER stress in H23 cells.

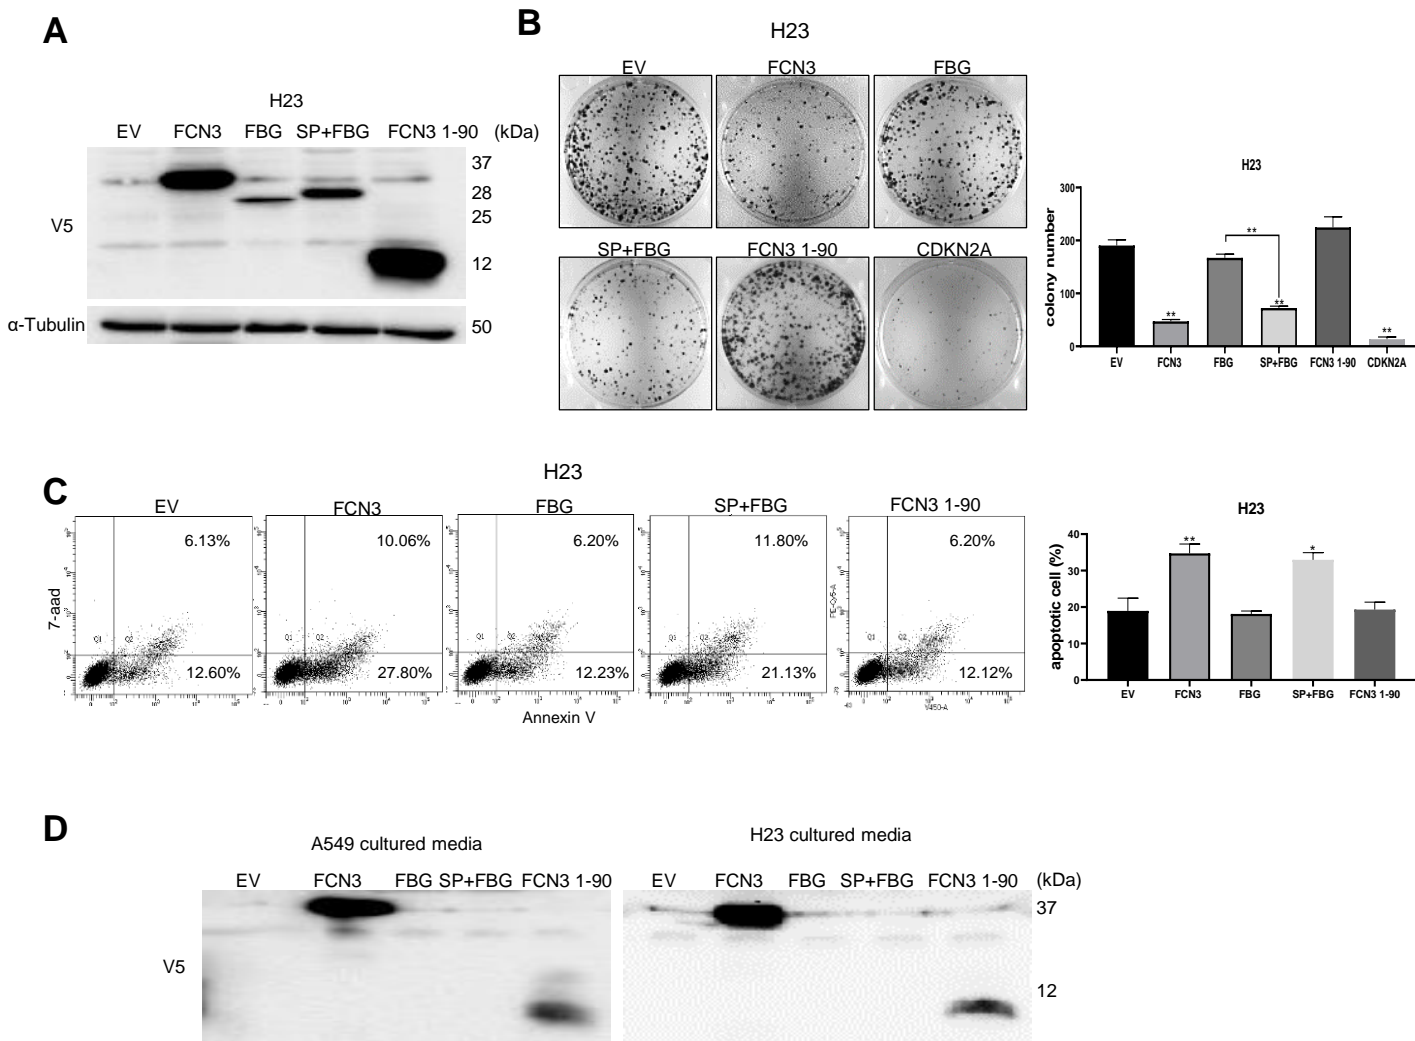

**Supplementary Fig. 5. Tumor suppressor activity of FCN3 derivatives in H23 cells.**

| <b>Gene</b>  | <b>Oligonucleotide sequence (5'→3')</b> |                          |
|--------------|-----------------------------------------|--------------------------|
| <b>FCN3</b>  | Forward                                 | CCCAGTCTTTTGTGACATGGA    |
|              | Reverse                                 | CCTGCTCTGTAGGAGGACCA     |
| <b>ATF6</b>  | Forward                                 | AGTTCGTCAGTTCCTCCTTACCTC |
|              | Reverse                                 | AGTTCTCTGCCTGCCACCAAG    |
| <b>CCNA2</b> | Forward                                 | TGCATCTCTGGGCGTCTTTG     |
|              | Reverse                                 | ACCCGGCCAAAGAATAGTCG     |
| <b>CHAC1</b> | Forward                                 | TGGTGACGCTCCTTGAAGATC    |
|              | Reverse                                 | GCACTGCCTCTCGCACATT      |
| <b>DDIT3</b> | Forward                                 | GCTCAGGAGGAAGAGGAGGA     |
|              | Reverse                                 | TCCTGCTTGAGCCGTTTCATT    |
| <b>E2F8</b>  | Forward                                 | GGACAGTACCTGCTTGCCTT     |
|              | Reverse                                 | GGAGGTCGCTTGACAGGAAA     |
| <b>HSPA5</b> | Forward                                 | CACTCCTGAAGGGGAACGTC     |
|              | Reverse                                 | ACCACCTTGAACGGCAAGAA     |
| <b>MCM2</b>  | Forward                                 | AATTCGTCCTGGGTCCTTT      |
|              | Reverse                                 | CACTTTGCCTGGACTCTCCT     |
| <b>MCM4</b>  | Forward                                 | TTCTTTGACCGTTACCCTGA     |
|              | Reverse                                 | ACACTTGGCACTGGAAGAAG     |
| <b>TOP2A</b> | Forward                                 | GCTGGATCAGTGGCTGAAAT     |
|              | Reverse                                 | AATGGGCTGCAAGAGGTTTA     |
| <b>XBP1</b>  | Forward                                 | TTGCTGAAGAGGAGGCGGAAG    |
|              | Reverse                                 | GGTCCAAGTTGTCCAGAATGC    |
| <b>ACTB</b>  | Forward                                 | ACAGAGCCTCGCCTTTGC       |
|              | Reverse                                 | GAAGCCGGCCTTGCACAT       |
| <b>HPRT1</b> | Forward                                 | ACACTGGCAAAACAATGCAG     |
|              | Reverse                                 | GTGGGGTCCTTTTCACCAG      |

**Supplementary Table 1. Oligonucleotide primers used in RT-PCR and quantitative real time RT-PCR.**
